# Supplementary material
Source: PubMed Central journal article supplement (PMC2755933)
Supplement: supp_M109.013151_jbc.M109.013151-1.pdf [file supp_M109.013151_jbc.M109.013151-1.pdf]

## **Supplemental Data**

Pages 2-4: **Figure S1.** Sequence alignment of *A. marina* full length protein with catalase-related proteins.

Page 5: **Scheme 1.** Analysis of the epoxide stereoconfiguration in the linoleic acid-derived epoxyalcohol product of the *A. marina* enzyme by chemical transformations.

Page 5: **Figure S2.** SDS-PAGE and UV-Vis spectrum of *A. marina* fusion protein purified by Ni-NTA affinity column.

Page 6: **Identification of peak 1 by GC-MS**

Page 7: **Table 1.** <sup>1</sup>H-NMR chemical shift of  $\alpha$ -ketol (12-hydroxy-13-keto-octadeca-9,15-dienoic acid).

Page 7: **Table 2.** <sup>1</sup>H-NMR chemical shift of the cyclopentenone.

Page 8: **Figure S3.** SP-HPLC analysis of the side chain transformation in alkali treated cyclopentenone molecule.

Page 8-10: **Products analysis of C18.4 $\omega$ 3 incubation with *A. marina* fusion protein by GC-MS**

Page 10: **Figure S4.** RP-HPLC profile of  $\gamma$ -ketol,  $\alpha$ -ketol and cyclopentenone from incubation of C20.4 $\omega$ 6 with *A. marina* fusion protein.

Page 10: **Table 3.** <sup>1</sup>H-NMR chemical shift of  $\alpha$ -ketol (9-hydroxy-10-keto-octadec-12Z-enoic acid).

Page 11: **Figure S5.** 13-hydroxy stereoconfiguration analysis by Chiralpak AD column using chemically transformed products.





Alignment **Figure S1**, third page

This shows the second half of the LOX domains

Highlighted in **Red** are the third and fourth iron ligands to the lipoxygenase domains and in **Blue** is the Gly-Ala determinant of R-S LOX specificity (Coffa and Brash, PNAS 101:15579, 2004)

|      |   |   |   |   |   |   |   |   |   |   |   |   |   |   |   |   |   |   |   |   |   |   |   |   |   |   |   |   |   |   |   |   |   |   |   |   |   |   |   |                     |                     |                     |                 |                     |
|------|---|---|---|---|---|---|---|---|---|---|---|---|---|---|---|---|---|---|---|---|---|---|---|---|---|---|---|---|---|---|---|---|---|---|---|---|---|---|---|---------------------|---------------------|---------------------|-----------------|---------------------|
| 550  | M | N | L | D | Q | Y | A | M | A | Y | Y | R | N | V | V | - | N | N | P | I | R | L | L | L | E | P | H | L | E | G | L | L | S | I | N | K | L | G | A | N                   | A Marina catLOX     |                     |                 |                     |
| 763  | L | T | T | E | S | F | A | L | S | T | W | R | N | L | A | S | A | H | P | V | F | K | L | L | Q | P | H | I | Y | G | V | L | A | I | D | T | I | G | R | K                   | P Homomalla catLOX  |                     |                 |                     |
| 728  | L | L | M | E | P | W | S | V | C | V | E | R | T | L | P | R | N | H | P | V | Y | R | V | L | R | P | H | L | I | Y | V | I | A | I | N | T | L | G | R | S                   | Ostreococcus catLOX |                     |                 |                     |
| 521  | F | N | I | E | Q | Y | V | M | A | I | K | R | R | L | A | P | T | H | P | V | R | A | F | I | N | P | H | L | E | G | L | I | F | I | N | S | S | A | V | P                   | Anabaena catLOX     |                     |                 |                     |
| 589  | L | I | S | G | P | T | G | F | I | P | E | A | S | S | L | T | P | E | S | V | D | D | V | L | K | D | E | I | S | H | L | S | Y | H | W | T | P | H | R | Q                   | A Marina catLOX     |                     |                 |                     |
| 803  | E | L | I | G | S | G | G | I | V | D | Q | S | L | S | L | G | G | G | H | V | T | F | M | E | K | C | F | K | E | V | N | L | Q | D | Y | H | L | P | N | P Homomalla catLOX  |                     |                     |                 |                     |
| 768  | L | L | I | S | P | G | G | V | T | D | R | V | V | A | V | G | Q | G | G | H | M | D | L | M | S | K | A | Y | Q | R | F | K | L | D | D | L | H | V | P | Ostreococcus catLOX |                     |                     |                 |                     |
| 561  | K | I | I | G | S | T | G | F | I | P | I | A | S | M | L | T | Q | G | S | I | V | D | V | M | K | N | E | L | S | K | L | S | Y | M | W | N | P | I | A | D                   | Anabaena catLOX     |                     |                 |                     |
| 629  | T | L | - | - | - | - | - | - | - | - | P | D | R | V | L | N | N | H | Y | D | P | A | A | I | A | M | W | N | L | L | T | Q | Y | V | R | E | F | F | E | D                   | H                   | A Marina catLOX     |                 |                     |
| 843  | A | L | K | K | R | G | V | D | D | P | S | K | L | P | G | F | Y | R | D | D | G | L | A | L | W | E | A | I | E | T | F | I | G | E | I | I | A | I | F | P                   | Homomalla catLOX    |                     |                 |                     |
| 808  | S | F | K | K | R | G | V | L | S | E | G | D | L | R | G | Y | H | H | R | D | D | S | L | R | A | W | A | C | L | R | R | F | A | K | S | I | F | K | L | H                   | Ostreococcus catLOX |                     |                 |                     |
| 601  | - | L | - | - | - | - | - | - | - | - | P | R | D | I | P | G | D | L | F | T | P | A | A | T | A | Y | W | E | L | L | N | N | Y | V | E | Q | G | L | - | -                   | L                   | Anabaena catLOX     |                 |                     |
| 662  | Q | A | G | M | E | E | Y | W | S | E | - | - | I | Q | A | M | S | H | D | L | V | T | H | S | I | L | - | K | P | E | L | - | - | G | T | L | A | V | Q | -                   | A                   | Marina catLOX       |                 |                     |
| 883  | Y | K | N | D | D | D | V | K | R | D | N | E | I | Q | S | W | I | Y | D | V | H | K | N | G | W | R | V | N | P | G | H | Q | D | H | G | V | P | A | S | F                   | P                   | Homomalla catLOX    |                 |                     |
| 848  | Y | T | S | D | A | E | V | A | A | D | P | Y | I | Q | S | M | I | L | E | M | Q | G | Y | G | Y | Q | - | G | T | D | R | S | Q | H | G | V | P | G | S | I                   | Ostreococcus catLOX |                     |                 |                     |
| 631  | Q | P | F | E | D | E | L | R | T | E | - | - | V | N | A | I | Q | V | D | E | L | F | A | E | L | K | - | E | R | S | L | Y | S | G | D | Q | P | P | K | Y                   | A                   | Anabaena catLOX     |                 |                     |
| 696  | N | N | A | D | - | L | Q | Q | L | C | V | Y | V | I | F | L | S | S | F | F | H | S | W | V | N | N | K | Q | Y | E | D | G | G | D | V | S | Y | S | T | I                   | A                   | Marina catLOX       |                 |                     |
| 923  | E | S | R | E | Q | L | K | E | V | L | T | S | L | V | F | T | F | S | C | Q | H | A | A | V | N | F | S | Q | K | D | H | Y | G | F | T | P | N | A | P | A                   | P                   | Homomalla catLOX    |                 |                     |
| 887  | D | S | I | D | Q | L | V | D | I | C | T | S | V | M | Y | T | C | S | F | T | H | A | A | V | N | F | S | Q | W | D | Y | Y | S | Y | C | P | N | R | P | L                   | O                   | Ostreococcus catLOX |                 |                     |
| 668  | D | S | S | E | - | L | K | S | L | L | M | Y | I | I | Y | H | S | S | F | L | H | S | W | A | N | F | K | Q | Y | D | D | A | G | N | P | N | H | V | S | M                   | A                   | Anabaena catLOX     |                 |                     |
| 735  | G | L | W | D | T | R | H | P | K | - | - | - | - | - | - | - | - | - | - | - | Y | D | P | L | R | V | A | E | R | E | A | K | Q | V | T | L | L | W | T | L                   | S                   | H                   | A Marina catLOX |                     |
| 963  | V | L | R | H | P | P | P | K | K | K | G | E | A | T | L | Q | S | I | L | S | T | L | P | S | K | S | Q | A | A | K | A | I | A | T | V | Y | I | L | T | K                   | P                   | Homomalla catLOX    |                 |                     |
| 927  | I | M | R | K | P | A | P | T | K | K | V | P | V | T | E | K | D | V | I | D | A | L | P | S | V | G | Q | A | A | Q | T | M | A | T | G | W | T | L | S | Q                   | O                   | Ostreococcus catLOX |                 |                     |
| 707  | G | - | - | - | - | D | Y | S | Q | - | - | - | - | - | - | - | - | - | - | - | Y | D | Q | Q | T | Q | D | K | I | R | F | S | Q | R | S | L | T | W | V | L                   | S                   | S                   | Anabaena catLOX |                     |
| 766  | V | - | - | - | - | - | - | - | - | - | - | - | - | - | - | - | - | - | - | - | - | - | - | - | - | - | - | - | - | - | - | - | - | - | - | - | - | - | - | -                   | -                   | -                   | A Marina catLOX |                     |
| 1003 | F | S | E | D | E | R | Y | L | G | N | Y | S | A | T | A | W | E | D | K | D | A | L | D | A | I | N | R | F | Q | D | K | L | E | D | I | S | K | K | I | K                   | P                   | Homomalla catLOX    |                 |                     |
| 967  | F | S | K | E | E | V | F | V | G | H | Y | I | T | D | M | M | I | T | P | A | E | I | A | A | L | Q | D | L | R | S | E | L | R | A | M | G | R | Q | I | E                   | O                   | Ostreococcus catLOX |                 |                     |
| 734  | I | - | - | - | - | - | - | - | - | - | - | - | - | - | - | - | - | - | - | - | - | - | - | - | - | - | - | - | - | - | - | - | - | - | - | - | - | - | - | -                   | -                   | -                   | Anabaena catLOX |                     |
| 783  | - | - | L | W | Q | Q | R | Q | H | I | E | P | G | I | P | L | A | N | L | M | M | S | T | N | I | - | - | - | - | - | - | - | - | - | - | - | - | - | - | -                   | -                   | -                   | -               | A Marina catLOX     |
| 1043 | Q | R | N | E | N | L | E | V | - | P | Y | I | Y | L | L | P | E | R | I | P | N | G | T | A | I | - | - | - | - | - | - | - | - | - | - | - | - | - | - | -                   | -                   | -                   | -               | P Homomalla catLOX  |
| 1007 | N | R | N | A | K | L | G | V | K | A | Y | P | Y | M | H | P | E | R | V | P | S | N | I | G | V | - | - | - | - | - | - | - | - | - | - | - | - | - | - | -                   | -                   | -                   | -               | Ostreococcus catLOX |
| 751  | - | - | I | R | E | K | S | S | I | L | E | P | G | L | P | L | E | D | L | M | M | S | I | N | I | - | - | - | - | - | - | - | - | - | - | - | - | - | - | -                   | -                   | -                   | -               | Anabaena catLOX     |

**Scheme 1.** Analysis of the epoxide stereoconfiguration in the linoleic acid-derived epoxyalcohol product of the *A. marina* enzyme by chemical transformations.

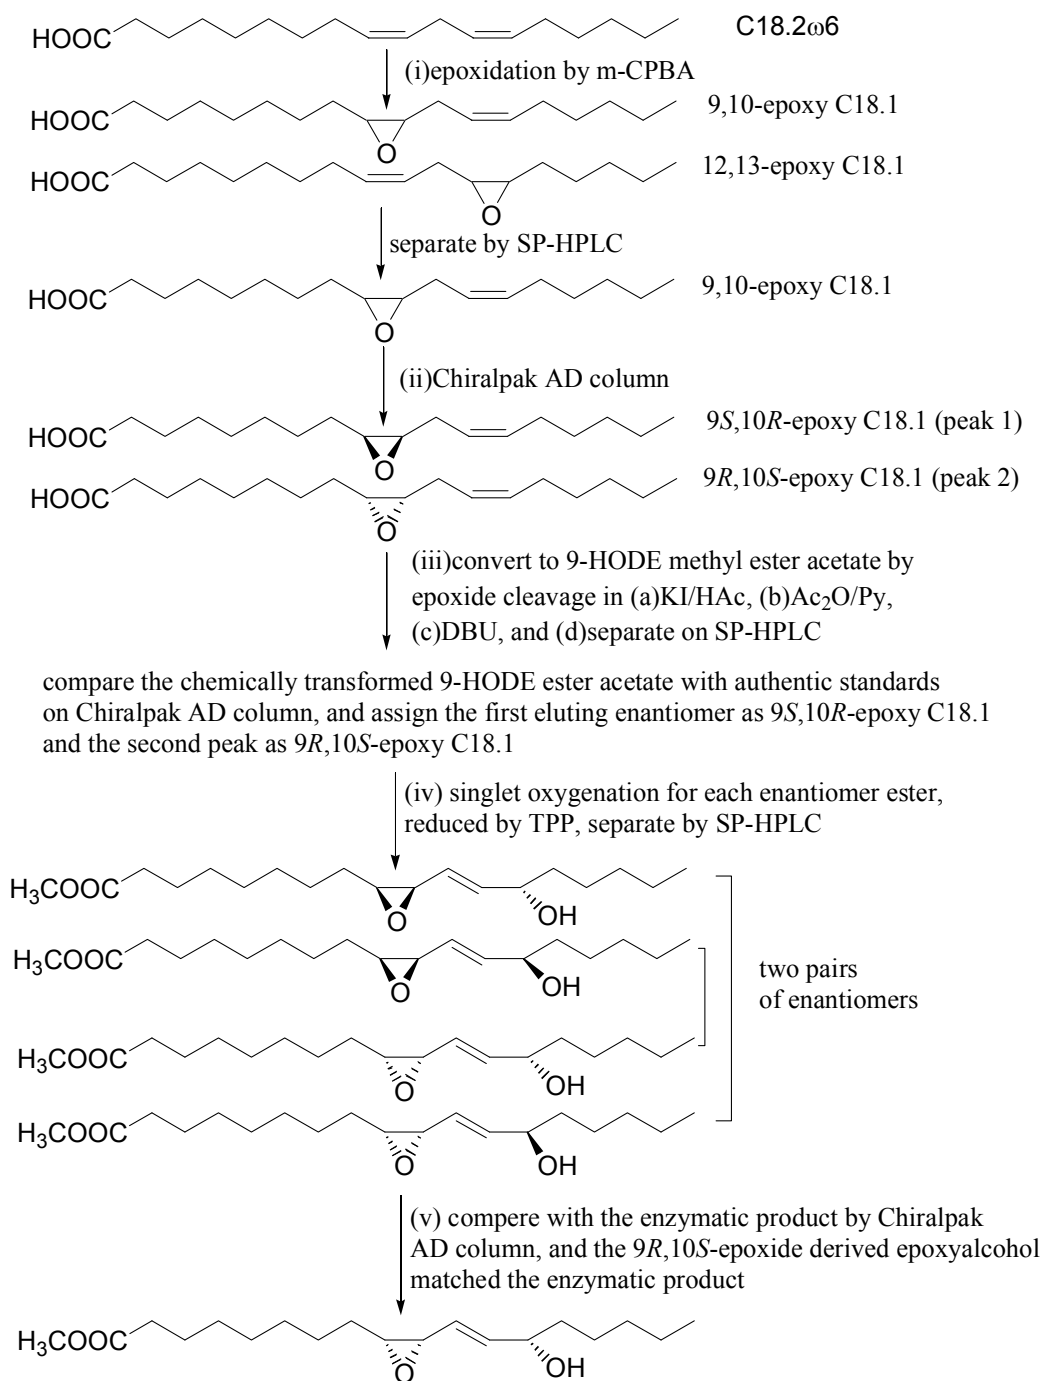

**Figure S2.** SDS-PAGE and UV-Vis spectrum of *A. marina* fusion protein purified by Ni-NTA affinity column. Panel A: SDS-PAGE indicating an expected 92 kD fusion protein. Panel B: the UV-Vis spectrum showing the main Soret band at 405 nm and the 10 fold expanded y-axis showing more Soret bands at the longer wavelength 500, 535 and 619

nm. The absorbance ratio for  $A_{405/280}$  is 0.52, demonstrating a good incorporation of heme in the purified protein.

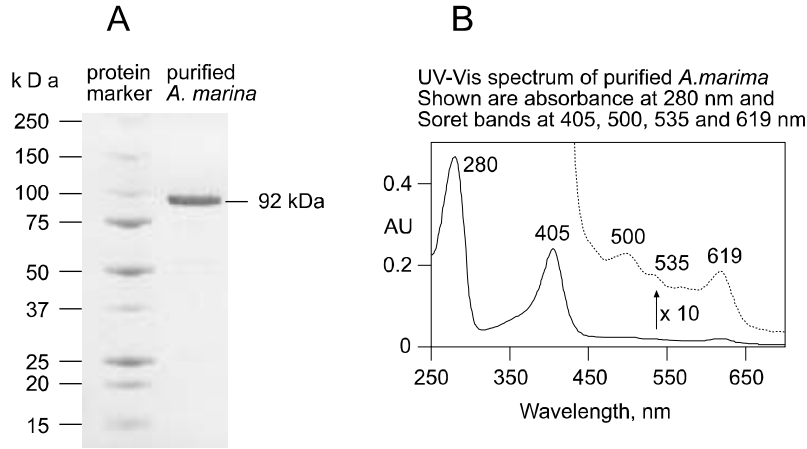

### Identification of peak 1 by GC-MS

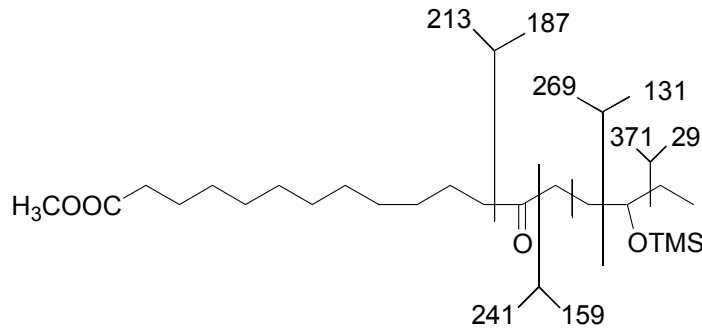

80229 #598-602 RT: 5.38-5.40 AV: 5 SB: 27 5.29-5.35, 5.44-5.55 NL: 2.20E6  
T: + c Full ms [70.00-900.00]

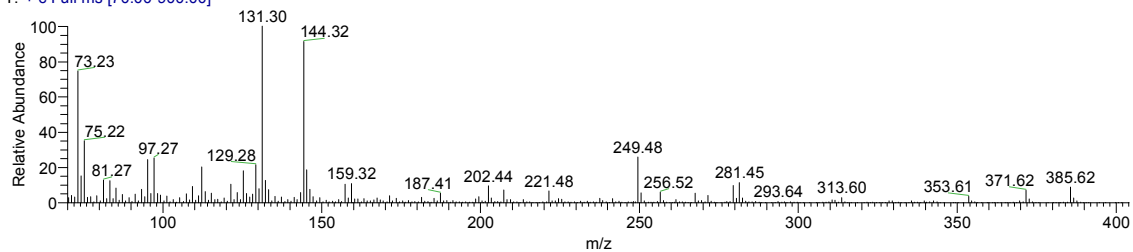

Peak 1 (refers to main text Figure 2A) compound was converted to methyl ester TMS ether derivative and hydrogenated. GC-MS spectrum showed a base ion at m/z of 131 (100%), which is the  $\alpha$ -cleavage between C15 and C16. The ion of m/z 144 (93%) was a rearrangement ion produced by cleavage between C14 and C15, followed by H migration from C15 to the carbonyl oxygen (H.W. Gardner et al, Lipids, Vol. 10, P602-608). Other ions are at m/z of 73 (75%), 159 (11%), 187 (5%), 281 (11%, 371-90[TMSOH]), 371 (7%, M-29), 385 (9%, M-15). The fragmentation pattern confirmed a structure of 13-keto-16-hydroxy-octadeca-9,14-dienoic acid for peak 1. Alternatively, peak 1 compound was converted to TMS ester TMS ether methoxime derivatives (with and without

hydrogenation). GC-MS spectrum again confirmed the structure as a  $\gamma$ -ketol of 13-keto-16-hydroxy-octadeca-9,14-dienoic acid.

**Table 1.**  $^1\text{H-NMR}$  chemical shift of  $\alpha$ -ketol (12-hydroxy-13-keto-octadeca-9,15-dienoic acid). NMR spectra were acquired at room temperature in d-benzene solvent.

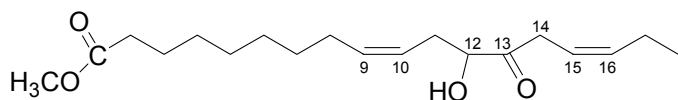

| Chemical shift | Multiplicity | Assignment, coupling constant                                        |
|----------------|--------------|----------------------------------------------------------------------|
| 5.57           | m            | H10                                                                  |
| 5.45           | m            | H9, H15, H16                                                         |
| 3.99           | dt           | H12; $J_{12,11} = 10.9\text{Hz}$ , $J_{12,\text{OH}} = 5.2\text{Hz}$ |
| 3.39           | d            | -OH (on C12); $J_{12,\text{OH}} = 5.2\text{Hz}$                      |
| 3.36           | s            | -OCH <sub>3</sub>                                                    |
| 2.97           | dd           | H11a; $J_{11a,12} = 6.8\text{Hz}$ , $J_{11a,10} = 17.8\text{Hz}$     |
| 2.80           | dd           | H11b; $J_{11b,12} = 7.0\text{Hz}$ , $J_{11b,10} = 17.8\text{Hz}$     |
| 2.45           | m            | H14a                                                                 |
| 2.23           | m            | H14b                                                                 |
| 2.11           | t            | H2, $J_{2,3} = 7.4\text{Hz}$                                         |
| 1.95           | m            | H8                                                                   |
| 1.83           | quintet      | H17; $J_{17,16} = 14.9\text{Hz}$ , $J_{17,18} = 7.5\text{Hz}$        |
| 1.55           | m            | H3                                                                   |
| 1.25           | m            | H7                                                                   |
| 1.17           | m            | H4, H5, H6                                                           |
| 0.84           | t            | H18; $J_{18,17} = 7.6\text{Hz}$                                      |

**Table 2.**  $^1\text{H-NMR}$  chemical shift of the cyclopentenone. NMR spectra were acquired at room temperature in d-benzene solvent.

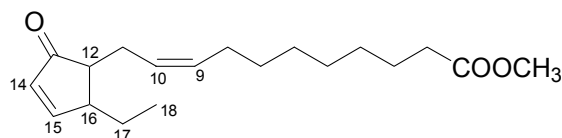

| Chemical shift | Multiplicity | Assignment, coupling constant                                |
|----------------|--------------|--------------------------------------------------------------|
| 7.01           | dd           | H15; $J_{15,14} = 5.8\text{Hz}$ , $J_{15,16} = 2.7\text{Hz}$ |
| 5.99           | d            | H14; $J_{14,15} = 5.9\text{Hz}$                              |
| 5.45           | quintet      | H9, H10; $J_{9,10} = 10.6\text{Hz}$                          |
| 3.36           | s            | -OCH <sub>3</sub>                                            |
| 2.72           | m            | H11a                                                         |
| 2.33           | m            | H16                                                          |

|      |         |                                 |
|------|---------|---------------------------------|
| 2.19 | m       | H11b                            |
| 2.12 | t,m     | H2, H12                         |
| 2.02 | m       | H8                              |
| 1.55 | quintet | H3                              |
| 1.49 | m       | H17a                            |
| 1.29 | m       | H7                              |
| 1.18 | m       | H4, H5, H6                      |
| 0.83 | m       | H17b                            |
| 0.65 | t       | H18; $J_{18,17} = 9.1\text{Hz}$ |

**Figure S3.** SP-HPLC analysis of the side chain transformation in alkali treated cyclopentenone molecule. The analysis was performed with the solvent hexane/isopropanol (100/1.5, v/v) using the silica column (4.6x250mm) at the flow rate of 1 ml/min.

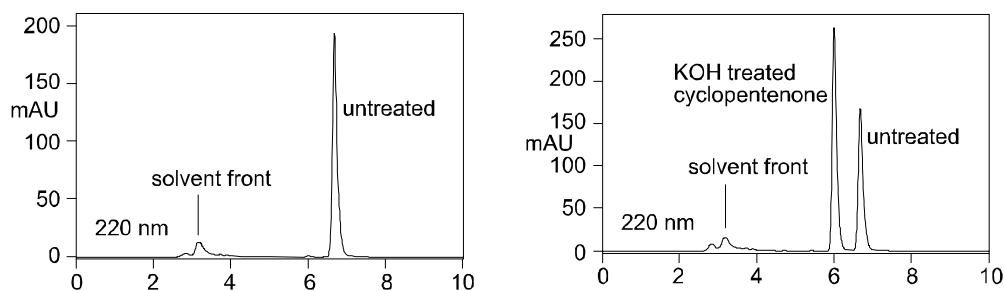

The alkali treatment to the cyclopentenone showed a peak shift to the left on SP-HPLC, confirmed a cis-trans transformation due to the alkali treatment, indicating a cis arrangement of the two side chains in cyclopentenone molecule.

## Products analysis of C18.4 $\omega$ 3 incubation with *A. marina* fusion protein by GC-MS

### 1. $\gamma$ -ketol identification:

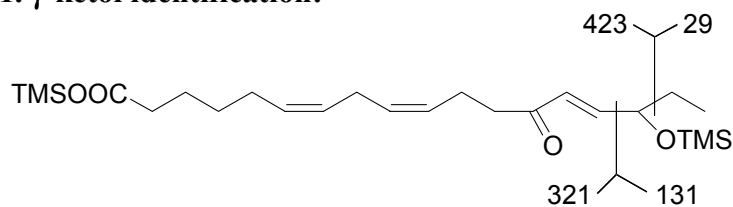



bg903160007 #1590-1595 RT: 8.89-8.93 AV: 6 SB: 24 8.81-8.87 , 8.95-9.01 NL: 4.87E6  
T: + c Full ms [70.00-600.00]

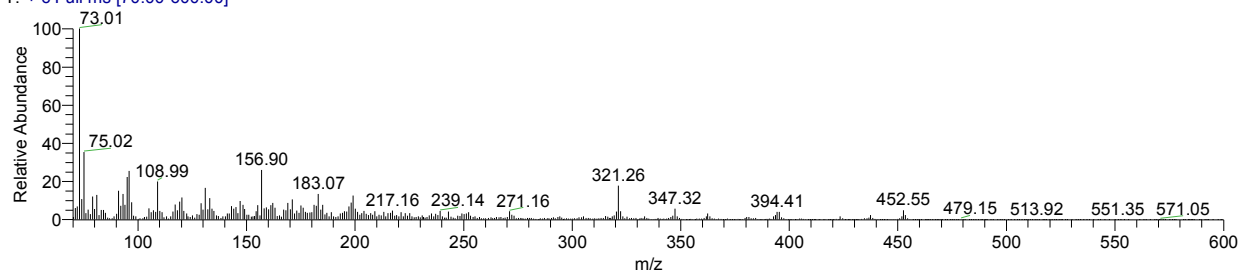

GC-MS spectrum of peak1(refers to main text Figure 2B) TMS ester TMS ether derivative showed ions of  $m/z$  at 73 (100%), 131 (17%), 321 (18%), 423 (0.2%, M-29), 437 (0.3%, M-15), and 452 (0.1%, M). These ions confirmed a molecular structure of 16-hydroxy-13-ketol-octadec-6,9Z,14E trienoic acid,  $\gamma$ -ketol.

## 2. $\alpha$ -ketol identification:

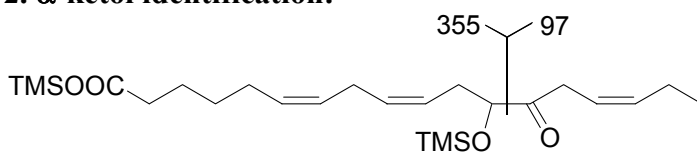

bg903160006 #1513-1516 RT: 8.53-8.55 AV: 4 SB: 15 8.49-8.52 , 8.57-8.60 NL: 4.18E6  
T: + c Full ms [70.00-600.00]

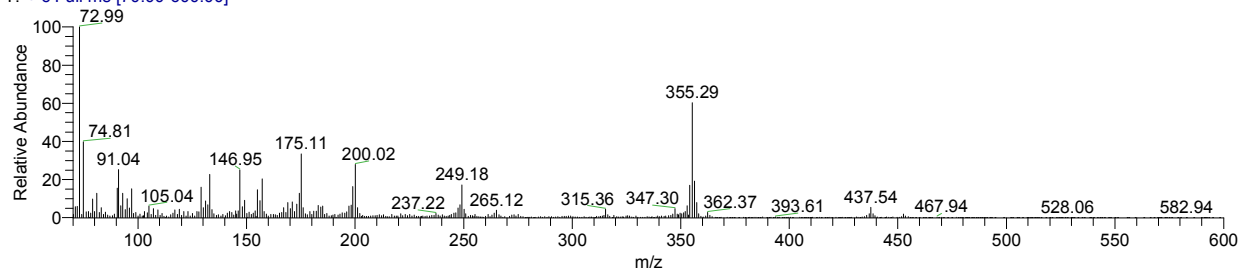

GC-MS spectrum of peak 2 (refers to main text Figure 2B) TMS ester TMS ether derivative showed ions of  $m/z$  at 73 (100%), 355 (60%), 97 (15%), 437 (3%, M-15), and 452 (0.2%, M), indicating a molecular structure of 12-hydroxy-13-ketol-octadec-6,9Z,15Z trienoic acid,  $\alpha$ -ketol.

## 3. Cyclopentenone identification:

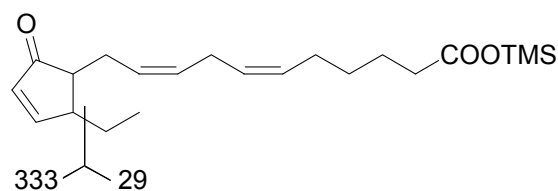

bg903160008 #1516-1520 RT: 8.55-8.58 AV: 5 SB: 28 8.47-8.54 , 8.61-8.68 NL: 8.57E5  
T: + c Full ms [70.00-600.00]

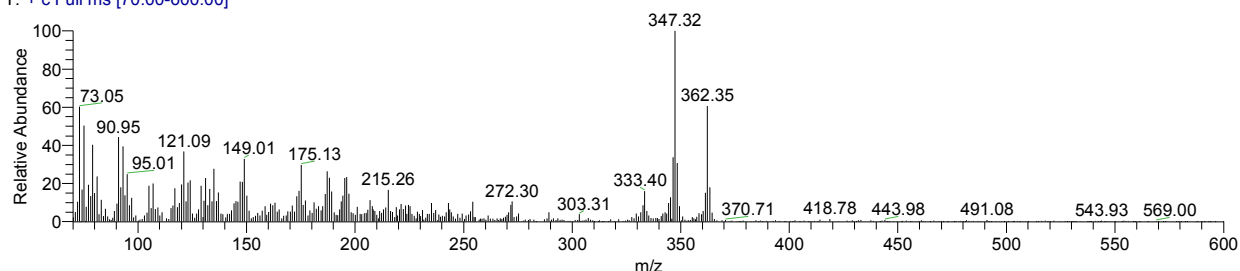

GC-MS spectrum of peak 3 (refers to main text Figure 2B) TMS ester TMS ether derivative showed ions of  $m/z$  at 347 (100%, M-15), 362 (61%, M), 73 (60%), 333 (20%, M-29). These ions confirmed a molecular structure of cyclopentenone.

**Figure S4.** RP-HPLC profile of  $\gamma$ -ketol,  $\alpha$ -ketol and cyclopentenone from incubation of C20.4 $\omega$ 6 with *A. marina*. The RP-HPLC was carried out using a Waters Symmetry C18 column (25 x 0.46 cm), a solvent system of methanol/water/acetic acid in the proportions 70/30/0.01 (v/v/v), a flow rate of 1 ml/min and with UV detection at 205 and 235nm.

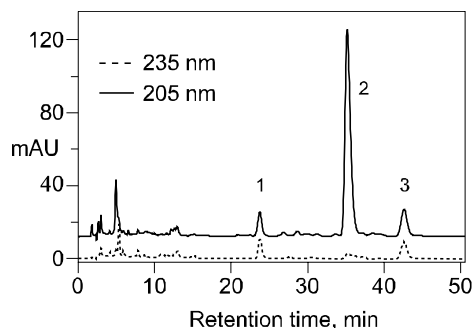

Peaks 1, 2, 3 of the RP-HPLC profile correspond to  $\gamma$ -ketol,  $\alpha$ -ketol and cyclopentenone, the hydrolysis and cyclization products from the allene oxide. They were identified by GC-MS (data not shown) and the typical UV spectra.

**Table 3.**  $^1\text{H-NMR}$  chemical shift of  $\alpha$ -ketol (9-hydroxy-10-keto-octadec-12Z-enoic acid). NMR spectra were acquired at room temperature in *d*-benzene solvent.

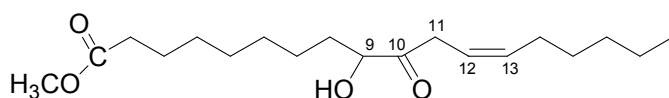

| Chemical shift | Multiplicity | Assignment, coupling constant                                    |
|----------------|--------------|------------------------------------------------------------------|
| 5.59           | m            | H12                                                              |
| 5.48           | m            | H13                                                              |
| 3.95           | m            | H9                                                               |
| 3.38           | s            | -OH                                                              |
| 3.35           | s            | -OCH <sub>3</sub>                                                |
| 2.98           | dd           | H11a; $J_{11a,12} = 14.3\text{Hz}$ , $J_{11a,13} = 6.0\text{Hz}$ |

|           |    |                                                                  |
|-----------|----|------------------------------------------------------------------|
| 2.81      | dd | H11b; $J_{11b,12} = 14.3\text{Hz}$ , $J_{11b,13} = 7.1\text{Hz}$ |
| 2.09      | t  | H2; $J_{2,3} = 7.1\text{Hz}$                                     |
| 1.87      | dt | H14; $J_{14,13} = 12.4\text{Hz}$ , $J_{14,15} = 6.2\text{Hz}$    |
| 1.58      | m  | H8b                                                              |
| 1.53      | m  | H3                                                               |
| 1.32-1.18 | m  | H4, H5, H6, H7, H8a, H15, H16, H17                               |
| 0.87      | t  | H18; $J_{18,17} = 7.1\text{Hz}$                                  |

**Figure S5.** 13-hydroxy stereoconfiguration analysis by Chiralpak AD column. The analysis was performed with the solvent hexane/ethanol (100/5, v/v) using the Chiralpak AD column (4.6x250mm) at the flow rate of 1 ml/min.

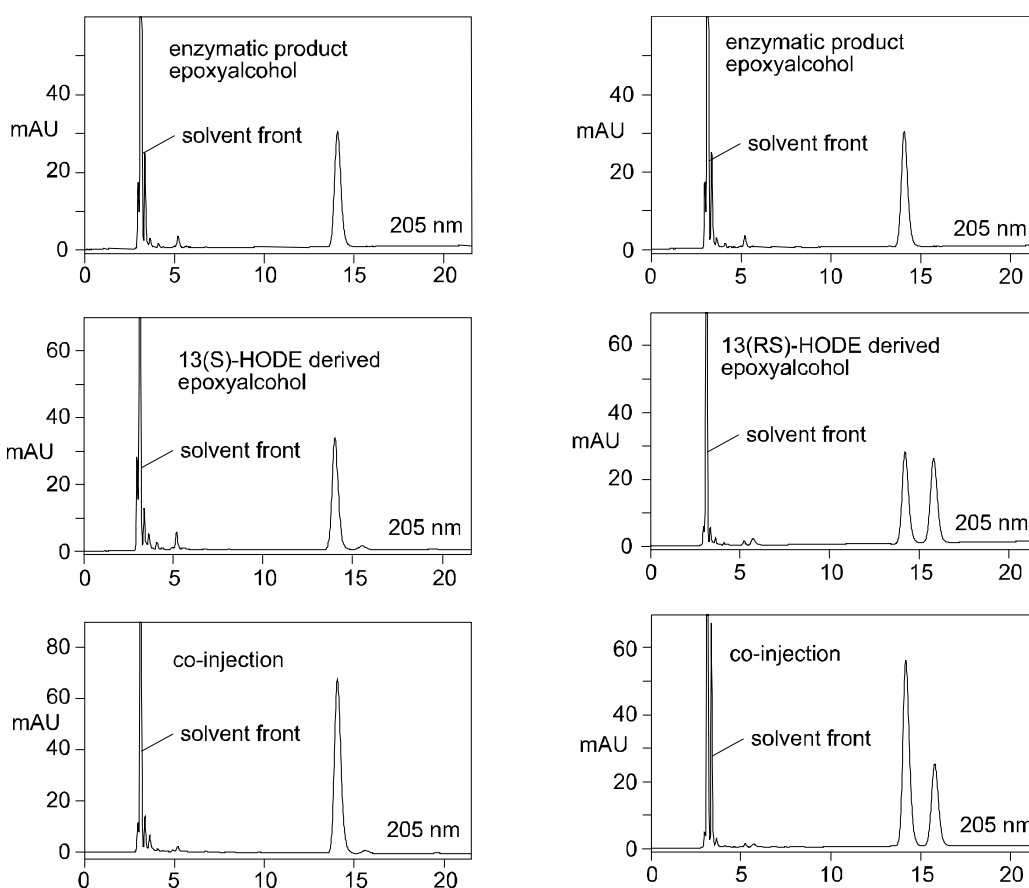

The three panels on the left side are from enzymatic product alone, 13*S*-HODE derived epoxyalcohol and coinjection of enzymatic product with the 13*S*-HODE derived epoxyalcohol, respectively. The 13*S*-HODE derived epoxyalcohol cochromatographed with the enzymatic product at the retention time 14.2 min, indicating a 13*S*-hydroxyl stereoconfiguration in the enzymatic epoxyalcohol. The three panels on the right side are from enzymatic product alone, 13*RS*-HODE derived epoxyalcohol and coinjection of enzymatic product with the 13*RS*-HODE derived epoxyalcohol, respectively. The results further confirmed a 13*S*-hydroxyl configuration in the enzymatic product.
